# Supplementary material for: Arbuscular Mycorrhiza Extraradical Mycelium Promotes Si and Mn Subcellular Redistribution in Wheat Grown under Mn Toxicity
Source: MDPI journal article supplement (doi:10.3390/ijpb13020009), 2022-05-16
Supplement: s1 [file s1]

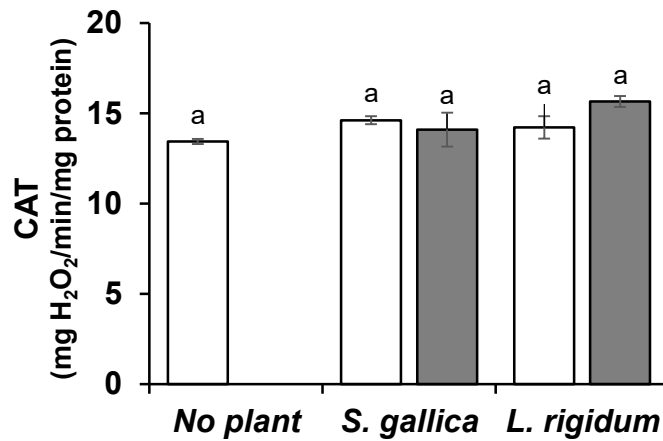

**Figure S1.** Activity of catalase (CAT) in shoots of 3-week-old wheat grown in disturbed (white columns) and undisturbed (grey columns) acid soil with previously grown arbuscular mycorrhizal fungi associated to *Silene gallica* L. (non-mycotrophic) and *Lolium rigidum* L. (strongly mycotrophic) and to no previous developer, in Mn toxic conditions. Different letters indicate statistically significant differences between the different treatments ( $p < 0.05$ ).

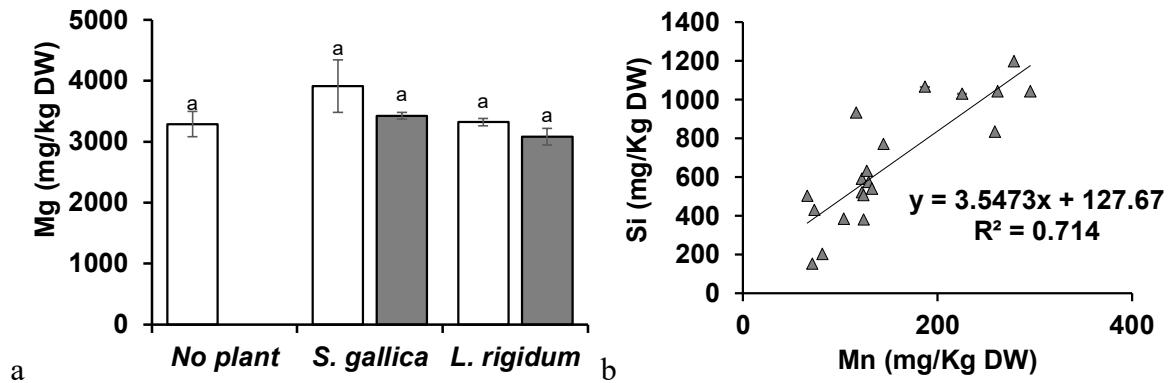

**Figure S2.** Concentration of Mg (a, columns) and correlation between Si and Mn concentrations (b, triangles) in shoots of 3-week-old wheat grown in disturbed (white columns) and undisturbed (grey columns) acid soil with previously grown arbuscular mycorrhizal fungi associated to *Silene gallica* L. (non-mycotrophic) and *Lolium rigidum* L. (strongly mycotrophic) and to no previous developer, in Mn toxic conditions. Different letters indicate statistically significant differences between the different treatments ( $p <$

0.05).

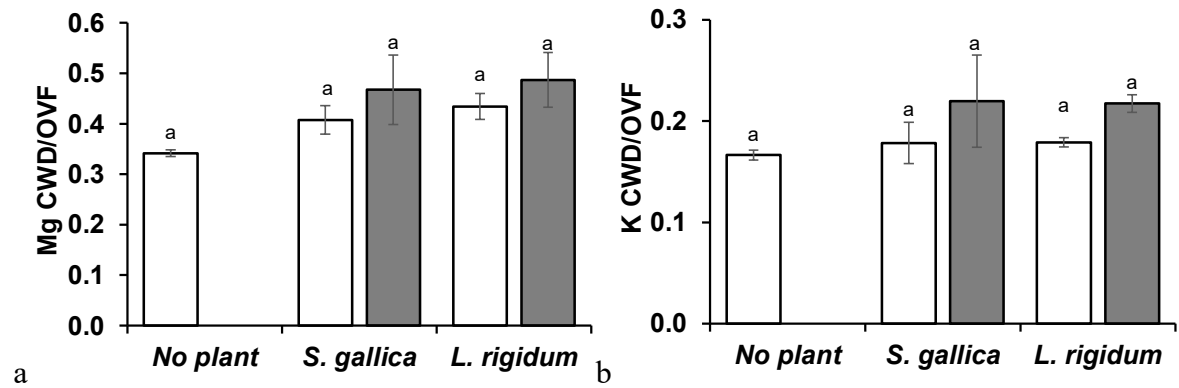

**Figure S3.** Cell wall fraction / organelle and vacuole fraction ratios for Mg (a) and K (b) in shoots of 3-week-old wheat grown in disturbed (white columns) and undisturbed (grey columns) acid soil with previously grown arbuscular mycorrhizal fungi associated to *Silene gallica* L. (non-mycotrophic) and *Lolium rigidum* L. (strongly mycotrophic) and to no previous developer, in Mn toxic conditions. Different letters indicate statistically significant differences between the different treatments ( $p < 0.05$ ).
