# Supplementary material for: Arbuscular Mycorrhiza Extraradical Mycelium Promotes Si and Mn Subcellular Redistribution in Wheat Grown under Mn Toxicity
Source: MDPI journal article supplement (doi:10.3390/ijpb13020009), 2022-05-16
Supplement: s1 [file s1]

Archive with 1 entries (1 files):
- ijpb-1713875-supplementary.pdf
